# Supplementary material for: ASA Status, NPPA/NPPB Haplotype and Coronary Artery Disease Have an Impact on BNP/NT-proBNP Plasma Levels
Source: MDPI journal article supplement (doi:10.3390/cells11050766), 2022-02-22
Supplement: s1 [file s1]

# Supplemental Material for

“ASA Status, NPPA/NPPB Haplotype and Coronary Artery Disease have an impact on BNP/NT-proBNP plasma levels”

**Table S1** Primer sequences for SNP genotyping

| reference<br>SNP | forward primer (5'-3') | reverse primer (5'-3') | donor probe (5'-3')                | detection probe (5'-3')                          | Annealing<br>temperature<br>C° |
|------------------|------------------------|------------------------|------------------------------------|--------------------------------------------------|--------------------------------|
| rs198389         | GGAGACACAGACAAGTCC     | CCTCCCTGCCTTTTCC       | GCAAATGTCCGGGTGTCCTA-<br>FAM       | AT620-TGGCGCTTTCTTCCTGCCTCCC-PHOS                | 53                             |
| rs198358         | AAATGCCCCTGGGACT       | GCTTCTGTTGTTGCCATC     | GGATGGATGCAGGAGCTGAAC<br>TGGCT-FAM | AT620-CACTGATGGAACGGCCACTTCT-PHOS                | 48                             |
| rs5063           | CTCCTTCTCCACCACCA      | AGCACAGCATCAGAAAGC     | GTACAATGCCGTGTCCAACGC-<br>FAM      | AT620-TGATGGATTTC AAGGTAGGGCCAGGA<br>AAGCGG-PHOS | 53                             |
| rs5068           | AGGGAGGACAAGCAGG       | GCGAGGAAGTCACCATC      | GGCTCCTGTCCCCTGGGGTCTC-<br>FAM     | AT620-TGCATTTGTGTCATCTTGTGTCATG-<br>PHOS         | 55                             |
| rs6676300        | TTCATGTCTCTCAACAGCAG   | CGGGAGGTGGAGGTTT       | GGAGAAAGGATGAGAGGTCCG<br>-FAM      | AT620-AATCTCGCCCTATCACCAGGCTGGA-<br>PHOS         | 52                             |
| rs11079028       | GCCCTCTGTTTGATCCTT     | CCTCGTCAGCTTTGGTC      | TCTAATGCTCACACTCCCAACA<br>CA-FAM   | AT620-TGGGCAGGGAGGCACCATTTCAG-<br>PHOS           | 60                             |
| rs632793         | GGATGATCGTTGCTGACTT    | TAACTAAAACAGCCTCTCACTC | TCACTAAGGGCTGAAGACTGG<br>GGACA-FAM | AT620-TTTCCTAGAAAACAAAGCCCAAGG-<br>PHOS          | 54                             |
| rs12562952       | CGGCTGAGTCAGGAGT       | CCTAGAAGAGGACTGGCA     | CTGGGCTGCAATGGCGAGGAC<br>AGA-FAM   | AT620-AGGCTGGTCCATCGTGTCTCTC-PHOS                | 55                             |

Abbreviations: rs Reference SNP number; SNP = single nucleotide polymorphism; G = guanine; A = adenine; C = cytosine; T = thymine

**Table S2.** Allele frequencies for genotyped single nucleotide polymorphisms.

| SNP        | Major Allele | Minor Allele | MAF  | p-value HWE* |
|------------|--------------|--------------|------|--------------|
| rs198389   | A            | G            | 0.41 | 0.3622       |
| rs198358   | T            | C            | 0.23 | 0.2216       |
| rs5063     | G            | A            | 0.05 | 0.0033       |
| rs5068     | A            | G            | 0.19 | 0.6446       |
| rs6676300  | T            | C            | 0.37 | 0.4057       |
| rs11079028 | C            | T            | 0.24 | 0.0003       |
| rs632793   | T            | C            | 0.4  | 0.5444       |
| rs12562952 | A            | G            | 0.09 | 0.0439       |

Abbreviations: rs Reference SNP number; SNP = single nucleotide polymorphism;

G = guanine; A = adenine; C = cytosine; T = thymine; HWE = Hardy Weinberg Equilibrium

MAF = Minor Allele Frequency

\*p-values for chi-square test for HWE

**Table S3.** Distribution of BNP and NT-proBNP across subgroups of categorical covariates

| Covariate                   | Subgroup | n (%)    | BNP [ng l <sup>-1</sup> ]  | p-value | NT-proBNP [ng l <sup>-1</sup> ] | p-value |
|-----------------------------|----------|----------|----------------------------|---------|---------------------------------|---------|
| Sex                         | Female   | 187 (44) | 26.0 (14.0, 55.0)          | 0.2600  | 72.0 (43.5, 155.5)              | 0.0639  |
|                             | Male     | 239 (56) | 22.0 (10.0, 56.0)          |         | 58.0 (25.0, 195.0)              |         |
| Coronary artery disease     | No       | 383 (90) | 21.0 (12.0, 48.0)          | 0.0000  | 58.0 (30.0, 129.5)              | 0.0000  |
|                             | Yes      | 42 (10)  | <b>101.5</b> (40.0, 202.5) |         | <b>331.0</b> (107.2, 597.2)     |         |
| Cerebrovascular disease     | No       | 410 (96) | 22.5 (12.0, 52.5)          | 0.0000  | 65.0 (31.25, 147.5)             | 0.0000  |
|                             | Yes      | 15 (4)   | <b>97.0</b> (59.5, 154.0)  |         | <b>478.0</b> (218.5, 958.5)     |         |
| Diabetes mellitus           | No       | 407 (96) | 24.0 (12.0, 54.0)          | 0.1871  | 65.0 (32.0, 151.0)              | 0.0215  |
|                             | Yes      | 17 (4)   | 48.0 (15.0, 84.0)          |         | 236.0 (67.0, 466.0)             |         |
| ASA physical classification | 1        | 60 (14)  | 15.5 (9.0, 22.0)           | 0.0000  | 33.5 (21.8, 53.3)               | 0.0000  |
|                             | 2        | 147 (35) | 15.0 (9.0, 26.0)           |         | 41.0 (21.0, 69.0)               |         |
|                             | 3        | 205 (48) | 44.0 (21.0, 90.0)          |         | 132.0 (66.0, 335.0)             |         |
|                             | 4        | 14 (3)   | <b>98.0</b> (78.5, 163.0)  |         | <b>446.0</b> (189.2, 874.2)     |         |
| NYHA class                  | 0        | 375 (89) | 22.0 (12.0, 51.0)          | 0.0047  | 60.0 (31.0, 141.5)              | 0.0012  |
|                             | 1        | 18 (4)   | 26.0 (15.0, 76.0)          |         | 81.5 (36.0, 176.8)              |         |
|                             | 2        | 25 (6)   | 37.0 (25.0, 102.0)         |         | 132.0 (82.0, 289.0)             |         |
|                             | 3        | 5 (1)    | <b>126.0</b> (38.0, 174.0) |         | 248.0 (161.0, 466.0)            |         |

Plasma concentrations of BNP (brain natriuretic peptide) and NT-proBNP (N-terminal pro natriuretic peptide) are displayed as median (IQR); ASA = American Society of Anesthesiologists; NYHA = New York Heart Association; **bold** type for median values above the cut-off values as used by the Canadian Cardiovascular Society (BNP  $\geq 92\text{ng l}^{-1}$ , NT-proBNP  $\geq 300\text{ng l}^{-1}$ ). No patients classified as NYHA class 4. The Kruskal-Wallis Test is used for variables with more than two levels and the Mann-Whitney-U Test for variables with two levels.

**Table S4.** P-values for post-hoc comparisons of single-SNP effects.

|           |    |        |        |
|-----------|----|--------|--------|
| rs198389  | GA | GA     | AA     |
|           | GG | 0.0013 | 0.0002 |
|           | GA |        | 1      |
|           |    | CT     | TT     |
| rs6676300 | CC | 0.0372 | 0.0013 |
|           | CT |        | 0.699  |
|           |    | CT     | TT     |
|           | CC | 0.0029 | 0.0003 |
| rs632793  | CT |        | 1      |
|           |    |        |        |

C = cytosine; T = thymine; G = guanine; A = adenine

**Table S5.** Generalized linear model coefficients to model haplotype effects on logarithmized BNP.

|                           | Coefficient | exp(Coefficient) | Standard Error | T statistic | P value |
|---------------------------|-------------|------------------|----------------|-------------|---------|
| Intercept                 | 2.03        | 7.61             | 0.37           | 5.46        | 0.000   |
| Haplotype CACGC           | 0.37        | 1.44             | 0.16           | 2.30        | 0.022   |
| Haplotype CGCGC           | -0.12       | 0.88             | 0.11           | -1.09       | 0.278   |
| Haplotype CGCGT           | 0.05        | 1.05             | 0.15           | 0.36        | 0.718   |
| Haplotype TACGC           | 0.16        | 1.18             | 0.08           | 1.94        | 0.053   |
| Haplotype rare            | -0.01       | 0.99             | 0.11           | -0.07       | 0.943   |
| ASA class II              | 0.21        | 1.24             | 0.17           | 1.28        | 0.202   |
| ASA class III             | 0.65        | 1.91             | 0.20           | 3.28        | 0.001   |
| ASA class IV              | 0.96        | 2.61             | 0.30           | 3.22        | 0.001   |
| Age (decades)             | 0.22        | 1.25             | 0.06           | 3.78        | 0.000   |
| Weight (kg)               | -0.01       | 0.99             | 0.00           | -3.15       | 0.002   |
| CAD yes                   | 0.61        | 1.84             | 0.16           | 3.91        | 0.000   |
| NYHA I                    | -0.09       | 0.91             | 0.21           | -0.44       | 0.661   |
| NYHA II                   | 0.02        | 1.02             | 0.18           | 0.13        | 0.894   |
| NYHA III                  | 0.25        | 1.29             | 0.38           | 0.66        | 0.507   |
| CVD yes                   | 0.31        | 1.36             | 0.24           | 1.27        | 0.207   |
| Diabetes yes              | -0.27       | 0.76             | 0.23           | -1.19       | 0.237   |
| Creatinine per 10 mcmol/l | 0.03        | 1.04             | 0.01           | 3.87        | 0.000   |
| Male sex                  | -0.08       | 0.93             | 0.10           | -0.78       | 0.434   |

Null deviance: 380.35 (348 df); residual deviance: 210.00 (330 df); AIC: 853.14

Abbreviations: ASA = American Society of Anesthesiologists; CAD = coronary artery disease; NYHA = New York Heart Association; CVD = cerebrovascular disease

Reference levels of factors are: Haplotype TATAT, CAD no, NYHA 0 (no heart failure), CVD no, Diabetes no, female sex

**Table S6.** Generalized linear model coefficients to model haplotype effects on logarithmized NT-proBNP.

|                           | Coefficient | exp(Coefficient) | Standard Error | T statistic | <i>P</i> value |
|---------------------------|-------------|------------------|----------------|-------------|----------------|
| Intercept                 | 2.77        | 16.02            | 0.43           | 6.44        | 0.000          |
| Haplotype CACGC           | 0.67        | 1.94             | 0.18           | 3.61        | 0.000          |
| Haplotype CGCGC           | -0.33       | 0.72             | 0.13           | -2.49       | 0.013          |
| Haplotype CGCGT           | -0.17       | 0.85             | 0.17           | -0.98       | 0.327          |
| Haplotype TACGC           | 0.06        | 1.06             | 0.10           | 0.56        | 0.576          |
| Haplotype rare            | -0.14       | 0.87             | 0.13           | -1.09       | 0.275          |
| ASA class II              | 0.34        | 1.41             | 0.19           | 1.77        | 0.078          |
| ASA class III             | 1.08        | 2.93             | 0.23           | 4.72        | 0.000          |
| ASA class IV              | 1.32        | 3.75             | 0.34           | 3.84        | 0.000          |
| Age (decades)             | 0.23        | 1.26             | 0.07           | 3.41        | 0.001          |
| Weight (kg)               | -0.01       | 0.99             | 0.00           | -3.46       | 0.001          |
| CAD yes                   | 0.65        | 1.92             | 0.18           | 3.62        | 0.000          |
| NYHA I                    | -0.28       | 0.76             | 0.25           | -1.13       | 0.260          |
| NYHA II                   | 0.06        | 1.06             | 0.21           | 0.28        | 0.779          |
| NYHA III                  | -0.07       | 0.93             | 0.44           | -0.16       | 0.874          |
| CVD yes                   | 0.59        | 1.81             | 0.28           | 2.11        | 0.036          |
| Diabetes yes              | -0.18       | 0.84             | 0.27           | -0.67       | 0.505          |
| Creatinine per 10 mcmol/l | 0.07        | 1.07             | 0.01           | 6.81        | 0.000          |
| Male sex                  | -0.25       | 0.78             | 0.11           | -2.24       | 0.026          |

Null deviance: 612.08 (348 df); residual deviance: 280.57 (330 df); AIC: 954.25

Abbreviations: ASA = American Society of Anesthesiologists; CAD = coronary artery disease; NYHA = New York Heart Association; CVD = cerebrovascular disease

Reference levels of factors are: Haplotype TATAT, CAD no, NYHA 0 (no heart failure), CVD no, Diabetes no, female sex
